# Supplementary material for: Genetic and molecular identification of genes required for female gametophyte development and function in Arabidopsis
Source: Oxford University Press journal article supplement (doi:10.1242/dev.01595), 2005-01-05
Supplement: dev01595supptable1.pdf [file dev01595supptable1.pdf]

Corrigendum

## **Genetic and molecular identification of genes required for female gametophyte development and function in *Arabidopsis***

Gabriela C. Pagnussat, Hee-Ju Yu, Quy A. Ngo, Sarojam Rajani, Sevugan Mayalagu, Cameron S. Johnson, Arnaud Capron, Li-Fen Xie, De Ye and Venkatesan Sundaresan *Development* **132**, 603-614.

Some of the data in Table S1 of this article were originally published incorrectly. The table that follows is the correct version and replaces the previous version.

The authors apologise to readers for this mistake.

**Table S1. Identity of the genes disrupted by Ds::KanR in female gametophytic mutants grouped by phenotypic category with the transmission ratios from self crosses for each mutant gene**

| General defect observed                              | Mutant line ID | DS element location | Kan <sup>R</sup> :Kan <sup>S</sup> self | ±s.e. |
|------------------------------------------------------|----------------|---------------------|-----------------------------------------|-------|
| In nuclear division phase of megagametogenesis       | EDA 1          | At1g59680           | 0.8952                                  | 0.032 |
|                                                      | EDA 2          | At2g18080*          | 0.3692                                  | 0.024 |
|                                                      | EDA 3          | At2g34860           | 0.5875                                  | 0.029 |
|                                                      | EDA 4          | At2g48140           | 0.5814                                  | 0.026 |
|                                                      | EDA 5          | At3g03650           | 0.1404                                  | 0.028 |
|                                                      | EDA 6          | At3g23440           | 0.8540                                  | 0.049 |
|                                                      | EDA 7          | At3g56990           | 0.4603                                  | 0.034 |
|                                                      | EDA 8          | At4g00310*          | 0.9527                                  | 0.029 |
|                                                      | EDA 9          | At4g34200           | 0.4121                                  | 0.029 |
| Abnormal nuclear numbers and positions               | EDA 10         | At1g01960           | 0.7965                                  | 0.028 |
|                                                      | EDA 11         | At1g55420           | 0.2963                                  | 0.032 |
|                                                      | EDA 12         | At2g35950           | 0.5513                                  | 0.028 |
|                                                      | EDA 13         | At2g47990           | 0.5939                                  | 0.030 |
|                                                      | EDA 14         | At3g60360           | 0.0927                                  | 0.032 |
|                                                      | EDA 15         | At4g14790           | 0.5696                                  | 0.043 |
| Arrested at varying stages of embryo sac development | EDA 16         | At1g61140           | 0.4508                                  | 0.034 |
|                                                      | EDA 17         | At1g72970           | 0.1354                                  | 0.031 |
|                                                      | EDA 18         | At2g34920           | 0.2727                                  | 0.041 |
|                                                      | EDA 19         | At2g47990           | 0.6415                                  | 0.030 |
|                                                      | EDA 20         | At4g00020           | 1.0496                                  | 0.029 |
|                                                      | EDA 21         | At4g13235           | 0.7118                                  | 0.036 |
|                                                      | EDA 22         | At5g05920           | 0.9074                                  | 0.028 |
|                                                      | EDA 23         | At5g44700           | 0.4042                                  | 0.025 |
| Unfused polar nuclei                                 | EDA 24         | At1g70540           | 0.6014                                  | 0.023 |
|                                                      | EDA 25         | At1g72440           | 1.0445                                  | 0.032 |
|                                                      | EDA 26         | At2g01730           | 1.1938                                  | 0.034 |
|                                                      | EDA 27         | At2g20490           | 0.9873                                  | 0.023 |
|                                                      | EDA 28         | At2g34790           | 0.9136                                  | 0.028 |
|                                                      | EDA 29         | At2g35940           | 1.1610                                  | 0.018 |
|                                                      | EDA 30         | At3g03810           | 0.0804                                  | 0.011 |
|                                                      | EDA 31         | At3g10000           | 0.2904                                  | 0.017 |
|                                                      | EDA 32         | At3g62210           | 0.4191                                  | 0.033 |
|                                                      | EDA 33         | At4g00120           | 1.0642                                  | 0.019 |
|                                                      | EDA 34         | At4g00140           | 1.1250                                  | 0.023 |
|                                                      | EDA 35         | At4g05440           | 0.1718                                  | 0.041 |
|                                                      | EDA 36         | At4g13890           | 0.3483                                  | 0.042 |
|                                                      | EDA 37         | At4g13890           | 0.3648                                  | 0.024 |
|                                                      | EDA 38         | At4g14040           | 0.7651                                  | 0.032 |
|                                                      | EDA 39         | At4g33050           | 1.3393                                  | 0.043 |
|                                                      | EDA 40         | At4g37890           | 1.0342                                  | 0.029 |
|                                                      | EDA 41         | At5g52460           | 1.3204                                  | 0.037 |
| Defects in fertilization                             | UNE 1          | At1g29300           | 0.8013                                  | 0.031 |
|                                                      | UNE 2          | At1g78130           | 0.9307                                  | 0.031 |
|                                                      | UNE 3          | At2g01110           | 1.4810                                  | 0.035 |
|                                                      | UNE 4          | At2g12940           | 1.1020                                  | 0.034 |
|                                                      | UNE 5          | At2g47470           | 1.3157                                  | 0.033 |
|                                                      | UNE 6          | At3g03340           | 1.2444                                  | 0.045 |
|                                                      | UNE 7          | At3g03690           | 0.1538                                  | 0.033 |
|                                                      | UNE 8          | At3g05690           | 1.1285                                  | 0.022 |
|                                                      | UNE 9          | At3g10560           | 0.3548                                  | 0.046 |
|                                                      | UNE 10         | At4g00050           | 0.8750                                  | 0.045 |
|                                                      | UNE 11         | At4g00080           | 1.0402                                  | 0.020 |
|                                                      | UNE 12         | At4g02590           | 0.7916                                  | 0.053 |
|                                                      | UNE 13         | At4g12620           | 0.9518                                  | 0.026 |
|                                                      | UNE 14         | At4g12860           | 0.5041                                  | 0.024 |
|                                                      | UNE 15         | At4g13560           | 0.8780                                  | 0.033 |
|                                                      | UNE 16         | At4g13640           | 0.1818                                  | 0.022 |
|                                                      | UNE 17         | At4g26330           | 0.9856                                  | 0.043 |
|                                                      | UNE 18         | At5g02100           | 0.3732                                  | 0.031 |
| Arrested at one-cell zygotic stage                   | MEE 1          | ND                  | 0.9512                                  | 0.039 |
|                                                      | MEE 2          | ND                  | 1.5324                                  | 0.035 |

|                            |        |            |        |        |
|----------------------------|--------|------------|--------|--------|
|                            | MEE 3  | At2g21650* | 0.5373 | 0.033  |
|                            | MEE 4  | At1g04630  | 0.4795 | 0.027  |
|                            | MEE 5  | At1g06220  | 1.1200 | 0.030  |
|                            | MEE 6  | At1g07890  | 0.7093 | 0.028  |
|                            | MEE 7  | At1g10470  | 1.1829 | 0.037  |
|                            | MEE 8  | At1g25310  | 1.4732 | 0.029  |
|                            | MEE 9  | At1g60870  | 0.8965 | 0.030  |
|                            | MEE 10 | At2g01200  | 0.8933 | 0.016  |
|                            | MEE 11 | At2g01620  | 0.6227 | 0.029  |
|                            | MEE 12 | At2g02955  | 1.0091 | 0.032  |
|                            | MEE 13 | At2g14680  | 0.1098 | 0.017  |
|                            | MEE 14 | At2g15890  | 0.5397 | 0.020  |
|                            | MEE 15 | At2g16970  | 1.1274 | 0.033  |
|                            | MEE 16 | At2g18650  | 0.6628 | 0.029  |
|                            | MEE 17 | At2g22250  | 1.3170 | 0.035  |
|                            | MEE 18 | At2g34090  | 0.4120 | 0.045  |
|                            | MEE 19 | At2g34130  | 1.1584 | 0.033  |
|                            | MEE 20 | At2g34220  | 1.2783 | 0.022  |
|                            | MEE 21 | At2g34570  | 0.7959 | 0.037  |
|                            | MEE 22 | At2g34780  | 0.7247 | 0.035  |
|                            | MEE 23 | At2g34790  | 1.1187 | 0.027  |
|                            | MEE 24 | At2g34830  | 0.4057 | 0.029  |
|                            | MEE 25 | At2g34850  | 0.5615 | 0.047  |
|                            | MEE 26 | At2g34870  | 1.1284 | 0.032  |
|                            | MEE 27 | At2g34880  | 0.4743 | 0.031  |
|                            | MEE 28 | At2g35210  | 0.4117 | 0.029  |
|                            | MEE 29 | At2g35340  | 0.2978 | 0.053  |
|                            | MEE 30 | At2g47470  | 0.7903 | 0.033  |
|                            | MEE 31 | At3g02570  | 0.8590 | 0.024  |
|                            | MEE 32 | At3g06350  | 1.4159 | 0.030  |
|                            | MEE 33 | At3g10920  | 0.2945 | 0.1016 |
|                            | MEE 34 | At3g11270  | 0.7241 | 0.031  |
|                            | MEE 35 | At3g15030  | 0.4953 | 0.026  |
|                            | MEE 36 | At3g16440  | 0.5157 | 0.028  |
|                            | MEE 37 | At3g23440  | 1.0698 | 0.023  |
|                            | MEE 38 | At3g43160  | 0.9677 | 0.036  |
|                            | MEE 39 | At3g46330  | 0.8584 | 0.020  |
|                            | MEE 40 | At3g53700  | 1.4545 | 0.035  |
|                            | MEE 41 | At3g62670  | 0.2077 | 0.039  |
|                            | MEE 42 | At3g63080  | 0.9382 | 0.028  |
|                            | MEE 43 | At4g00020  | 0.9639 | 0.030  |
|                            | MEE 44 | At4g00060  | 1.0638 | 0.048  |
|                            | MEE 45 | At4g00260  | 1.2947 | 0.033  |
|                            | MEE 46 | At4g00310  | 1.0103 | 0.036  |
|                            | MEE 47 | At4g00950  | 1.0824 | 0.035  |
|                            | MEE 48 | At4g14080* | 0.1906 | 0.023  |
|                            | MEE 49 | At4g01560  | 0.7448 | 0.038  |
|                            | MEE 50 | At4g00231  | 1.0267 | 0.033  |
|                            | MEE 51 | At4g04040  | 0.2720 | 0.031  |
|                            | MEE 52 | At4g04160  | 0.7784 | 0.029  |
|                            | MEE 53 | At4g10560  | 0.2116 | 0.033  |
|                            | MEE 54 | At4g11850  | 0.6142 | 0.032  |
|                            | MEE 55 | At4g13345  | 0.8492 | 0.032  |
|                            | MEE 56 | At4g13380  | 0.9166 | 0.026  |
|                            | MEE 57 | At4g13610  | 0.4782 | 0.040  |
|                            | MEE 58 | At4g13940  | 1.1509 | 0.033  |
|                            | MEE 59 | At4g37300  | 1.2449 | 0.034  |
|                            | MEE 60 | At5g05950  | 0.6666 | 0.040  |
|                            | MEE 61 | At5g14220  | 0.1785 | 0.023  |
|                            | MEE 62 | At5g45800  | 1.3690 | 0.035  |
| Embryo development defects | MEE 63 | At1g02140  | 0.9514 | 0.035  |
|                            | MEE 64 | At1g79860  | 1.2798 | 0.021  |
|                            | MEE 65 | At2g01280  | 1.2546 | 0.015  |
|                            | MEE 66 | At2g02240  | 0.6418 | 0.046  |
|                            | MEE 67 | At3g10110  | 0.4018 | 0.036  |
|                            | MEE 68 | At4g24660  | 1.1428 | 0.033  |
|                            | MEE 69 | At4g37140  | 1.2923 | 0.040  |
|                            | MEE 70 | At5g58230  | 0.8166 | 0.193  |
