# Supplementary material for: Genetic and molecular identification of genes required for female gametophyte development and function in Arabidopsis
Source: Oxford University Press journal article supplement (doi:10.1242/dev.01595), 2005-01-05
Supplement: dev01595supptable2.pdf [file dev01595supptable2.pdf]

Corrigendum

## **Genetic and molecular identification of genes required for female gametophyte development and function in *Arabidopsis***

Gabriela C. Pagnussat, Hee-Ju Yu, Quy A. Ngo, Sarojam Rajani, Sevugan Mayalagu, Cameron S. Johnson, Arnaud Capron, Li-Fen Xie, De Ye and Venkatesan Sundaresan *Development* **132**, 603-614.

Some of the data in Table S2 of this article were originally published incorrectly. The table that follows is the correct version and replaces the previous version.

The authors apologise to readers for this mistake.

**Table S2. Identity and full description of the genes disrupted by Ds::KanR in female gametophytic mutants according to the current annotation in the TAIR database**

| General defect observed                              | Mutant line ID | DS element location | Annotation                                             |
|------------------------------------------------------|----------------|---------------------|--------------------------------------------------------|
| In nuclear division phase of megagametogenesis       | EDA 1          | At1g59680           | F-box family protein                                   |
|                                                      | EDA 2          | At2g18080*          | Auxin-responsive family protein                        |
|                                                      | EDA 3          | At2g34860           | Chaperone protein dnaJ-related                         |
|                                                      | EDA 4          | At2g48140           | Protease inhibitor/seed storage/lipid transfer protein |
|                                                      | EDA 5          | At3g03650           | Exostosin family protein                               |
|                                                      | EDA 6          | At3g23440           | Expressed protein                                      |
|                                                      | EDA 7          | At3g56990           | Glycine-rich protein                                   |
|                                                      | EDA 8          | At4g00310*          | Expressed protein                                      |
|                                                      | EDA 9          | At4g34200           | D-3-phosphoglycerate dehydrogenase, putative           |
| Abnormal nuclear numbers and positions               | EDA 10         | At1g01960           | Guanine nucleotide exchange family protein             |
|                                                      | EDA 11         | At1g55420           | DC1 domain-containing protein                          |
|                                                      | EDA 12         | At2g35950           | Expressed protein                                      |
|                                                      | EDA 13         | At2g47990           | Transducin family protein                              |
|                                                      | EDA 14         | At3g60360           | Expressed protein                                      |
|                                                      | EDA 15         | At4g14790           | ATP-dependent RNA helicase, mitochondrial (SUV3)       |
| Arrested at varying stages of embryo sac development | EDA 16         | At1g61140           | SNF2 domain-containing protein                         |
|                                                      | EDA 17         | At1g72970           | Glucose-methanol-choline (GMC) oxidoreductase          |
|                                                      | EDA 18         | At2g34920           | Ubiquitin-protein ligase-related                       |
|                                                      | EDA 19         | At2g47990           | Transducin family protein                              |
|                                                      | EDA 20         | At4g00020           | BRCA2 repeat-containing protein                        |
|                                                      | EDA 21         | At4g13235           | Late embryogenesis abundant protein                    |
|                                                      | EDA 22         | At5g05920           | Deoxyhypusine synthase                                 |
|                                                      | EDA 23         | At5g44700           | Leucine-rich repeat transmembrane protein kinase       |
|                                                      | EDA 24         | At1g70540           | Invertase/pectin methylesterase inhibitor              |
| Unfused polar nuclei                                 | EDA 25         | At1g72440           | CCAAT-box-binding transcription factor                 |
|                                                      | EDA 26         | At2g01730           | Metallo-beta-lactamase family protein                  |
|                                                      | EDA 27         | At2g20490           | Nucleolar RNA-binding Nop10p family protein            |
|                                                      | EDA 28         | At2g34790           | FAD-binding domain-containing protein                  |
|                                                      | EDA 29         | At2g35940           | Homeodomain-containing protein                         |
|                                                      | EDA 30         | At3g03810           | Expressed protein                                      |
|                                                      | EDA 31         | At3g10000           | DNA-binding protein-related                            |
|                                                      | EDA 32         | At3g62210           | Expressed protein                                      |
|                                                      | EDA 33         | At4g00120           | Basic helix-loop-helix (bhlh) family protein           |
|                                                      | EDA 34         | At4g00140           | Expressed protein                                      |
|                                                      | EDA 35         | At4g05450           | Adrenodoxin-like ferredoxin 2                          |
|                                                      | EDA 36         | At4g13890           | Glycine hydroxymethyltransferase, putative             |
|                                                      | EDA 37         | At4g13890           | Glycine hydroxymethyltransferase, putative             |
|                                                      | EDA 38         | At4g14040           | Selenium-binding protein, putative                     |
|                                                      | EDA 39         | At4g33050           | Calmodulin-binding family protein                      |
|                                                      | EDA 40         | At4g37890           | Zinc finger (C3HC4-type RING finger) family protein    |
|                                                      | EDA 41         | At5g52460           | F-box family protein                                   |
| Defects in fertilization                             | UNE 1          | At1g29300           | Expressed protein                                      |
|                                                      | UNE 2          | At1g78130           | Transporter-related                                    |
|                                                      | UNE 3          | At2g01110           | Thylakoid membrane formation protein                   |
|                                                      | UNE 4          | At2g12940           | Expressed protein                                      |
|                                                      | UNE 5          | At2g47470           | Thioredoxin family protein                             |
|                                                      | UNE 6          | At3g03340           | LUC7 N_terminus domain-containing protein              |
|                                                      | UNE 7          | At3g03690           | Glycosyltransferase family 14 protein                  |
|                                                      | UNE 8          | At3g05690           | CCAAT-binding transcription factor                     |
|                                                      | UNE 9          | At3g10560           | Cytochrome P450                                        |
|                                                      | UNE 10         | At4g00050           | Basic helix-loop-helix (bhlh) family protein           |
|                                                      | UNE 11         | At4g00080           | Invertase/pectin methylesterase inhibitor              |
|                                                      | UNE 12         | At4g02590           | Basic helix-loop-helix (bhlh) family protein           |
|                                                      | UNE 13         | At4g12620           | Replication control protein                            |
|                                                      | UNE 14         | At4g12860           | Calcium-binding protein                                |
|                                                      | UNE 15         | At4g13560           | Late embryogenesis abundant domain-containing protein  |
|                                                      | UNE 16         | At4g13640           | Myb family transcription factor                        |
|                                                      | UNE 17         | At4g26330           | Subtilase family protein                               |
|                                                      | UNE 18         | At5g02100           | Oxysterol-binding family protein                       |
| Arrested at one-cell zygotic stage                   | MEE 1          | ND                  | –                                                      |
|                                                      | MEE 2          | ND                  | –                                                      |
|                                                      | MEE 3          | At2g21650*          | Myb family transcription factor                        |
|                                                      | MEE 4          | At1g04630           | Expressed protein                                      |
|                                                      | MEE 5          | At1g06220           | Elongation factor Tu family protein                    |

|                            |            |                                                               |                                                               |
|----------------------------|------------|---------------------------------------------------------------|---------------------------------------------------------------|
| MEE 6                      | At1g07890  | L-ascorbate peroxidase 1, cytosolic (APX1)                    |                                                               |
| MEE 7                      | At1g10470  | Two-component responsive regulator                            |                                                               |
| MEE 8                      | At1g25310  | Basic helix-loop-helix (bhlh) family protein                  |                                                               |
| MEE 9                      | At1g60870  | Expressed protein                                             |                                                               |
| MEE 10                     | At2g01200  | Auxin-responsive AUX/IAA family protein                       |                                                               |
| MEE 11                     | At2g01620  | Expressed protein                                             |                                                               |
| MEE 12                     | At2g02955  | Expressed protein                                             |                                                               |
| MEE 13                     | At2g14680  | Myosin heavy chain-related                                    |                                                               |
| MEE 14                     | At2g15890  | Expressed protein                                             |                                                               |
| MEE 15                     | At2g16970  | Expressed protein                                             |                                                               |
| MEE 16                     | At2g18650  | Zinc finger (C3HC4-type RING finger)                          |                                                               |
| MEE 17                     | At2g22250  | Aminotransferase class I and II family protein                |                                                               |
| MEE 18                     | At2g34090  | Expressed protein                                             |                                                               |
| MEE 19                     | At2g34130  | Pseudogene                                                    |                                                               |
| MEE 20                     | At2g34220  | Hypothetical protein                                          |                                                               |
| MEE 21                     | At2g34570  | Expressed protein                                             |                                                               |
| MEE 22                     | At2g34780  | Expressed protein                                             |                                                               |
| MEE 23                     | At2g34790  | FAD-binding domain-containing protein                         |                                                               |
| MEE 24                     | At2g34830  | WRKY family transcription factor                              |                                                               |
| MEE 25                     | At2g34850  | NAD-dependent epimerase/dehydratase family protein            |                                                               |
| MEE 26                     | At2g34870  | Hydroxyproline-rich glycoprotein family protein               |                                                               |
| MEE 27                     | At2g34880  | Transcription factor jumonji (jmj) family protein             |                                                               |
| MEE 28                     | At2g35210  | Human Rev interacting-like family protein                     |                                                               |
| MEE 29                     | At2g35340  | RNA helicase, putative                                        |                                                               |
| MEE 30                     | At2g47470  | Thioredoxin family protein                                    |                                                               |
| MEE 31                     | At3g02570  | Phosphomannose isomerase type I family protein                |                                                               |
| MEE 32                     | At3g06350  | Dehydroquinase dehydratase, putative                          |                                                               |
| MEE 33                     | At3g10920  | Superoxide dismutase [Mn], mitochondrial                      |                                                               |
| MEE 34                     | At3g11270  | 26S proteasome non-ATPase regulatory subunit 7, putative      |                                                               |
| MEE 35                     | At3g15030  | TCP family transcription factor, putative                     |                                                               |
| MEE 36                     | At3g16440  | Jacalin lectin family protein                                 |                                                               |
| MEE 37                     | At3g23440  | Expressed protein                                             |                                                               |
| MEE 38                     | At3g43160  | Expressed protein                                             |                                                               |
| MEE 39                     | At3g46330  | Leucine-rich repeat protein kinase, putative                  |                                                               |
| MEE 40                     | At3g53700  | Pentatricopeptide (PPR) repeat-containing protein             |                                                               |
| MEE 41                     | At3g62670  | Two-component responsive regulator family protein             |                                                               |
| MEE 42                     | At3g63080  | Glutathione peroxidase, putative                              |                                                               |
| MEE 43                     | At4g00020  | BRCA2 repeat-containing protein                               |                                                               |
| MEE 44                     | At4g00060  | Nucleotidyltransferase family protein                         |                                                               |
| MEE 45                     | At4g00260  | Transcriptional factor B3 family protein                      |                                                               |
| MEE 46                     | At4g00310  | Expressed protein                                             |                                                               |
| MEE 47                     | At4g00950  | Expressed protein                                             |                                                               |
| MEE 48                     | At4g14080* | Glycosyl hydrolase family 17 protein                          |                                                               |
| MEE 49                     | At4g01560  | Brix domain-containing protein                                |                                                               |
| MEE 50                     | At4g00231  | Ataxin-related protein                                        |                                                               |
| MEE 51                     | At4g04040  | Pyrophosphate--fructose-6-phosphate 1-phosphotransferase beta |                                                               |
| MEE 52                     | At4g04160  | Hypothetical protein                                          |                                                               |
| MEE 53                     | At4g10560  | DC1 domain-containing protein                                 |                                                               |
| MEE 54                     | At4g11850  | Phospholipase D gamma 1                                       |                                                               |
| MEE 55                     | At4g13345  | TMS membrane family protein                                   |                                                               |
| MEE 56                     | At4g13380  | Heavy-metal-associated domain-containing protein              |                                                               |
| MEE 57                     | At4g13610  | DNA (cytosine-5-)-methyltransferase, putative                 |                                                               |
| MEE 58                     | At4g13940  | Adenosylhomocysteinase                                        |                                                               |
| MEE 59                     | At4g37300  | Expressed protein                                             |                                                               |
| MEE 60                     | At5g05950  | Expressed protein                                             |                                                               |
| MEE 61                     | At5g14220  | Protoporphyrinogen oxidase, putative                          |                                                               |
| MEE 62                     | At5g45800  | Leucine-rich repeat transmembrane protein kinase              |                                                               |
| Embryo development defects | MEE 63     | At1g02140                                                     | Mago nashi family protein                                     |
|                            | MEE 64     | At1g79860                                                     | Expressed protein                                             |
|                            | MEE 65     | At2g01280                                                     | Transcription factor IIB (TFIIB) family protein               |
|                            | MEE 66     | At2g02240                                                     | F-box family protein                                          |
|                            | MEE 67     | At3g10110                                                     | Mitochondrial import inner membrane translocase subunit Tim17 |
|                            | MEE 68     | At4g24660                                                     | Zinc finger homeobox family protein                           |
|                            | MEE 69     | At4g37140                                                     | Esterase, putative                                            |
|                            | MEE 70     | At5g58230                                                     | WD-40 repeat protein MS11                                     |
